1 **Title:** West African pre-pandemic cross-reactive antibody and cellular responses  
2 against SARS-CoV-2

3  
4 **Authors:** Bobby Brooke Herrera,<sup>1-4</sup> Beth Chaplin,<sup>4</sup> Souleymane MBoup,<sup>5</sup> Adam  
5 Abdullahi,<sup>6,7</sup> Michelle He,<sup>4</sup> Sydney M. Fisher,<sup>4</sup> Sulaimon Akanmu,<sup>8</sup> Charlotte A Chang,<sup>4</sup>  
6 Donald J Hamel,<sup>4</sup> Ravindra K. Gupta,<sup>6,7</sup> Phyllis J Kanki<sup>4</sup>

7  
8 **Affiliations:**

9 <sup>1</sup>Rutgers Global Health Institute, Rutgers University, New Brunswick, NJ, USA

10 <sup>2</sup>Department of Medicine, Division of Allergy, Immunology, and Infectious Diseases, and  
11 Child Health Institute of New Jersey, Rutgers Robert Wood Johnson Medical School,  
12 Rutgers University, New Brunswick, NJ, USA

13 <sup>3</sup>Mir Biosciences, Inc., Dunellen, NJ, USA

14 <sup>4</sup>Department of Immunology and Infectious Diseases, Harvard T.H. Chan School of  
15 Public Health, Boston, MA, USA

16 <sup>5</sup>Institut de Recherche en Santé de Surveillance épidémiologique et de formation  
17 (IRESSEF), Dakar, Senegal

18 <sup>6</sup>Cambridge Institute of Therapeutic Immunology & Infectious Disease (CITIID),

19 Cambridge, UK <sup>7</sup>Department of Medicine, University of Cambridge, Cambridge, UK

20 <sup>8</sup>Lagos University Teaching Hospital, College of Medicine, University of Lagos, Lagos,  
21 Nigeria

22 **Correspondence:** PK, [pkanki@hsph.harvard.edu](mailto:pkanki@hsph.harvard.edu)

23 **Abstract**

24           The COVID-19 pandemic had a severe impact globally, yet African populations  
25 exhibited unexpectedly lower rates of severe disease and mortality. We investigated the  
26 potential role of pre-existing immunity in shaping the epidemiology of COVID-19 in  
27 Africa. Leveraging paired plasma and peripheral blood mononuclear cells collected from  
28 Senegalese female sex workers prior to the COVID-19 pandemic, we observed  
29 substantial levels of pre-existing cross-reactive immunity to SARS-CoV-2, stemming  
30 from prior exposure to seasonal human coronaviruses (hCoVs). Our antibody analysis  
31 revealed a 23.5% (47/200) seroprevalence rate against SARS-CoV-2 nucleocapsid (N).  
32 Of these SARS-CoV-2 N-reactives, 85.1% (40/47), 44.7% (21/47), and 95.7% (45/47)  
33 showed antibody reactivity against hCoV-229E or hCoV-OC43 spike (S) and/or N or  
34 hCoV-HKU1 S. Our analysis of cellular responses also demonstrated cross-reactivity to  
35 SARS-CoV-2 with 82.2% (37/45) and 84.4% (38/45) showing IFN- $\gamma$  responses against  
36 S and N, respectively. These findings suggest that prior hCoV exposure may induce  
37 cross-reactive adaptive immunity, potentially contributing to protection against COVID-  
38 19. A unique pre-pandemic subject had cross-reactive SARS-CoV-2 S antibodies with  
39 detectable neutralization and cellular responses. Our study provides unique insights into  
40 the dynamics of hCoV and SARS-CoV-2 immunity in West African populations and  
41 underscores the importance of understanding the role of pre-existing immunity in  
42 shaping COVID-19 outcomes globally.

43

44

45

## 46 **Introduction**

47           The first COVID-19 cases were recorded on the African continent in March 2020,  
48 yet by the end of the pandemic in May 2023, Africa's reported SARS-CoV-2 infections  
49 and deaths constituted only 2-4% of the global disease burden despite being home to  
50 ~17% of the world's population. Early projections of the COVID-19 pandemic's impact  
51 on Africa predicted massive loss of life. Most African countries lacked adequate  
52 healthcare infrastructure, workforce, and equipped facilities to cope with a novel and  
53 highly infectious respiratory pathogen. However, other characteristics of most African  
54 countries suggested different outcomes from what was seen in resource-rich settings.<sup>1</sup>  
55 Africa's relatively young population age distribution with lower rates of co-existing  
56 morbidities, environmental factors, and pre-existing immunity from exposure to related  
57 viruses may explain the unexpected low rates of severe disease and mortality observed  
58 in Africa.<sup>2</sup>

59           In 2020, SARS-CoV-2 emerged as a new human coronavirus, even though  
60 worldwide populations were known to be regularly exposed to seasonal human  
61 coronaviruses (hCoVs) responsible for the "common cold," including  $\alpha$ -coronaviruses  
62 (hCoV-229E, hCoV-NL63,) and  $\beta$ -coronaviruses (hCoV-OC43, hCoV-HKU1). Although  
63 associated with mild illness, these hCoVs share genetic similarity to the SARS  
64 coronaviruses, which include SARS-CoV-1, SARS-CoV-2, and Middle East Respiratory  
65 Syndrome (MERS). hCoVs are globally endemic and estimated to be responsible for up  
66 to 15-30% of pre-pandemic annual respiratory infections, which are seasonal (e.g., fall  
67 and winter) and most prevalent in young children.

68           The widespread circulation of hCoVs with repeated exposure of human  
69 populations and shared sequence homology to SARS-CoV-2 led to the suggestion that  
70 hCoV immunologic memory could result in cross-reactive cellular and humoral  
71 responses that might in part explain the heterogeneity of COVID-19 presenting  
72 symptoms and pathogenic outcomes. While not providing sterilizing immunity, pre-  
73 existing hCoV immunity could reduce transmission and ameliorate symptoms of the  
74 related SARS-CoV-2. Therefore, research has been conducted to determine the role of  
75 pre-existing cross-reactive immunity to SARS-CoV-2. Multiple US and European studies  
76 described CD4+ T cell reactivity in SARS-CoV-2 unexposed individuals, attributed to  
77 pre-existing memory responses to hCoVs.<sup>3-7</sup> In a UK household study, exposed  
78 contacts that remained PCR-negative showed significantly higher frequency of cross-  
79 reactive ( $p=.0139$ ) and nucleocapsid (N)-specific IL-2 secreting memory T cells  
80 ( $p=.0355$ ).<sup>3</sup> Swadling et al. in a study of potentially abortive SARS-CoV-2 infection in UK  
81 healthcare workers (HCWs) described pre-existing T cell reactivity directed against the  
82 early transcribed replication-transcription complex (RTC).<sup>4</sup> The RTC, consisting of RNA  
83 polymerase co-factor non-structural protein 7 (NSP7), RNA polymerase NSP12 and  
84 helicase NSP13, is expressed early in the viral life cycle and is highly conserved among  
85 members of *Coronaviridae*.<sup>4</sup> Studies of pre-pandemic samples collected from Africa  
86 have also demonstrated cross-reactive T cell responses against several SARS-CoV-2  
87 antigens.<sup>5,6</sup> These studies have led to the hypothesis that prior hCoV infection might  
88 provide protective cross-reactive memory, perhaps more likely in younger individuals in  
89 whom infections with hCoVs are more prevalent and recent. As described by Lipsitch et  
90 al., pre-existing cross-reactive memory T cells could lower respiratory tract viral load

91 thereby limiting the duration and severity of disease with potential to reduce viral  
92 spread.<sup>7</sup>

93 Pre-existing antibody studies have also described distinct humoral responses to  
94 SARS-CoV-2 associated with prior hCoV infection. Ng et al. described uninfected  
95 donors with IgG reactivity to conserved epitopes in the S2 subunit of the SARS-CoV-2  
96 spike (S) protein distinct from de novo humoral responses in infected individuals that  
97 targeted both S1 and S2 subunits with concomitant IgM and IgA responses.<sup>8</sup> Multiple  
98 studies conducted in the US and Europe have identified antibodies to hCoVs (OC43)  
99 that were associated with lower risk of severe COVID-19.<sup>9, 10</sup>

100 Over the course of the COVID-19 pandemic in Africa, studies based on SARS-  
101 CoV-2 antibody detection described high prevalence rates of infection, in contrast with  
102 surveillance data.<sup>11</sup> Yet, even with anticipated underreporting, severe COVID-19 cases  
103 and mortality remained unexpectedly low.<sup>12</sup> While multiple factors are likely to contribute  
104 to the capacity of individuals to generate cross-reactivity, it is possible that the order and  
105 composition of different infections may play a role in determining the efficacy of the  
106 immune response in preventing symptomatic or severe COVID-19. Currently, high rates  
107 of SARS-CoV-2 infection and COVID-19 vaccine exposure globally challenge the ability  
108 to investigate cross-reactive responses in individuals who have not been exposed to  
109 SARS-CoV-2. While our research group has reported on SARS-CoV-2 immune  
110 responses in Nigeria,<sup>5</sup> in this study we leveraged paired plasma and peripheral blood  
111 mononuclear cell (PBMC) samples collected in Senegal, West Africa prior to the COVID-  
112 19 pandemic. Our objectives were to measure hCoV seroprevalence rates and to  
113 characterize the pre-existing cross-reactive antibody and cellular responses to SARS-

114 CoV-2 in our pre-pandemic West African samples. The aim was to understand whether  
115 and how pre-existing hCoV immunity might confer protection against severe COVID-19  
116 disease in Africa.

117

## 118 **Methods**

119

### 120 Human samples:

121       The plasma and PBMC archive was developed from our multi-decade  
122 prospective cohort study of HIV-1 and HIV-2 in Senegalese female sex workers  
123 (FSWs), followed from 1986-2010.<sup>13-15</sup> Self-identified FSW routinely visiting a health  
124 care clinic in Dakar provided blood samples to test for multiple sexually transmitted  
125 infections, including HIV-1 and HIV-2 and were examined clinically; excess blood  
126 samples were de-identified and archived with their corresponding clinical data. More  
127 than 80% of women sampled were HIV negative and most had paired plasma and liquid  
128 nitrogen preserved PBMCs with accompanying clinical and immunologic data at more  
129 than 2 timepoints. The viability and functional integrity of these cryopreserved PBMCs  
130 have been previously demonstrated in our studies of HIV and flavivirus T-cell  
131 immunity.<sup>16-18</sup> The plasma and PBMC samples tested for this study were collected from  
132 2004 to 2005. At the time of the original study, all women provided informed consent for  
133 the collection and archiving of samples and corresponding data; ethical clearance from  
134 the Harvard Institutional Review Board (IRB) and the research ethics committee at  
135 Chiekh Anta Diop University, Dakar, Senegal were obtained. All archived samples and  
136 corresponding data were anonymized, and as such this secondary analysis did not

137 constitute human subject research by institutional guidelines and regulations which  
138 follow the Federal Policy for Protection of Human Subjects.

139 Virion-based immunoblots:

140 We screened plasma samples by immunoblot assay on virion preparations from  
141 SARS-CoV-2. Briefly, Vero E6 cells or susceptible cell line were infected with SARS-  
142 CoV-2 (Isolate USA-WA1/2020, BEI Resources NR-52281) or hCoVs (OC43, NL63,  
143 229E, BEI Resources NR-5621, 470 and 52726, respectively) and propagated for five  
144 days. Supernatants were clarified at 10,000g for 20min at 4°C, precipitated with PEG-  
145 8000 and NaCl, and then resolved by sucrose gradient ultracentrifugation at 170,000g  
146 for 90min at 4°C. Viral pellets were lysed with complete NP40 buffer containing  
147 protease inhibitors. Viral lysates were added to nonreducing buffer (final concentrations  
148 of 2% SDS, 0.5 M Tris pH 6.8, 20% glycerol, 0.001% bromophenol blue) and subjected  
149 to 12% PAGE and Western blot analysis using patient serum (1:250) as primary  
150 antibody and anti-human IgG horseradish peroxidase (HRP) (1:2,000; ThermoFisher  
151 Scientific, Waltham, MA) as secondary antibody. Visualization was performed using  
152 Metal Enhanced DAB Substrate Kit (ThermoFisher Scientific, Waltham, MA) per the  
153 manufacturer's instructions.

154 RecomLine SARS-CoV-2 IgG (Mikrogen)<sup>19, 20</sup> is a CE-marked immunoblot assay  
155 which determines the IgG responses towards the recombinant N antigens of the  
156 seasonal hCoV 229E, OC43, NL63 and HKU-1 in parallel to SARS-CoV-2 N, receptor-  
157 binding domain (RBD), and S1 antigens.

158

159 ELISPOT assay:

160 ELISPOT assays were conducted as described previously<sup>16, 21, 22</sup>. In brief,  
161 200,000 PBMCs per well were seeded in duplicate into 96-well plates coated with anti-  
162 human IFN- $\gamma$  (Becton Dickinson (BD), Franklin Lakes, NJ). The cells were stimulated  
163 with fusion proteins consisting of a modified version of the *Bacillus anthracis* lethal  
164 factor (LFn) and SARS-<sup>21</sup>CoV-2 S or N ((Mir Biosciences, Inc., Dunellen, NJ) and either  
165 a negative (LFn alone, Mir Biosciences, Inc., Dunellen, NJ) or positive (PHA,  
166 ThermoFisher, Waltham, MA) control at 37°C with 5% CO<sub>2</sub> for 24 hours. LFn has been  
167 shown to transport protein cargoes into the cell cytosol for MHC Class I and II  
168 processing, inducing T cell responses.<sup>16, 21, 22</sup> After incubation, plates were washed  
169 followed by incubation for 2 hours at room temperature with a secondary antibody (BD,  
170 Franklin Lakes, NJ). Subsequently, plates were washed and incubated with streptavidin  
171 (BD, Franklin Lakes, NJ) for 1 hour at room temperature. Finally, plates were washed  
172 and incubated with substrate (BD, Franklin Lakes, NJ) for 30 minutes. IFN- $\gamma$  spot  
173 forming cells (SFC) were counted using the ImmunoSpot S6 Ultra M2 Analyzer<sup>16, 21, 22</sup>  
174 (ImmunoSpot, Shaker Heights, OH)

175 **Virus neutralization titer analyses**

176  
177 Pseudotype virus neutralization assay was performed on Hela-ACE2 cells using SARS-  
178 CoV-2 spike pseudotype virus (PV) expressing luciferase as previously described.<sup>23, 24</sup>  
179 Briefly, dried plasma spots were eluted and heat inactivated at 54°C for 1 hour,<sup>25</sup> and  
180 incubated with PVs at 37°C for 1 hour prior to addition of Hela-ACE2 cells. The plasma  
181 dilution/virus mix was incubated for 48 hours in a 5% CO<sub>2</sub> environment at 37°C, and



182 luminescence was measured using the Bright-Glo Luciferase assay system (Promega  
183 UK, United Kingdom). Neutralization was calculated relative to the virus and cell only  
184 controls. Data was analyzed in GraphPad Prism v9.3.1 where 50% neutralization (ID<sub>50</sub>)  
185 values were calculated and the limit of detection for neutralization was set at ID<sub>50</sub> of 20  
186 units.

## 187 **Statistics**

188 Bivariate analyses explored associations between select demographic  
189 characteristics of the women with available data and SARS-CoV-2 N-reactive  
190 immunoblot results. Demographic characteristics included: year of sampling, age at  
191 sampling, neighborhood, ethnicity, country of origin, marital status, religion, education,  
192 and total children. The chi-square test was used to obtain p-values to detect statistically  
193 significant associations, and Fisher's exact test for categories with observed  
194 frequencies  $\leq 5$ .

195

## 196 **Results**

197

198 *Pre-pandemic cross-reactive SARS-CoV-2 antibody responses and hCoV*  
199 *seroprevalence rates*

200

201 Pre-pandemic plasma samples (n=200) from the Senegalese FSW cohort were  
202 analyzed for the presence of antibodies directed against SARS-CoV-2 S and/or N. 152  
203 of 200 (76%) were negative, while 47 (23.5%) showed reactivity to SARS-CoV-2 N,

204 suggestive of prior exposure to hCoVs (Fig. 1, Fig. 2A). To determine hCoV  
205 seroprevalence rates, the 47 samples reactive to SARS-CoV-2 N-only were analyzed  
206 for antibodies directed against hCoV-229E S and N, hCoV-OC43 S and N, and hCoV-  
207 HKU1 S. Of the samples tested, 37 (78.7%) samples showed reactivity to hCoV-229E  
208 S<sub>±</sub>N, 7 (14.9%) to hCoV-OC43 S<sub>±</sub>N, and 45 (95.7%) to hCoV-HKU1 S (Fig. 1, Fig. 2B-  
209 D). Of the 37 hCoV-229E S<sub>±</sub>N samples, 30 (81.1%) were reactive to S+N, while 7  
210 (18.9%) were reactive to S-only. Of the 7 hCoV-OC43 S<sub>±</sub>N samples, 6 (85.7%) were  
211 reactive to S+N, while 1 (14.3%) was reactive to S-only. Of note, 36 out of the 47  
212 samples (76.6%) were reactive to both hCoV-229E S and hCoV-HKU1 S  
213 (Supplementary Fig. 1). Only 6 (12.8%) were reactive to S of hCoV-229E, hCoV-OC43,  
214 and hCoV-HKU1 (Supplementary Figs. 2-3).

215

#### 216 *Risk factor analysis*

217 Bivariate analysis of risk factors associated with SARS-CoV-2 N antibody  
218 reactivity included: year of sampling, age at sampling, neighborhood, ethnicity, country  
219 of origin, marital status, religion, education, and total children. There was a potential  
220 association between SARS-CoV-2 N-reactive and age >44 years ( $p=0.078$ ) and with  
221 having  $\geq 3$  children ( $p=0.044$ ) (Table 1). Older age had a strong positive correlation with  
222 having more children.

223

#### 224 *Pre-pandemic cross-reactive T-cell responses to SARS-CoV-2*

225

226 Of the 47 pre-pandemic samples that showed antibody reactivity to SARS-CoV-2  
227 N-only and also antibody reactivity to hCoV S+N/S, 45 paired PBMCs were available,  
228 along with 21 paired PBMCs from negative controls, and were analyzed for cross-  
229 reactive IFN- $\gamma$  cellular responses against SARS-CoV-2 S and N. Among SARS-CoV-2  
230 N-reactives, 37 (82.2%) showed IFN- $\gamma$  reactivity against SARS-CoV-2 S (Fig. 3A-B)  
231 while 9 (19.6%) were negative. Similarly, 38 (84.4%) showed IFN- $\gamma$  reactivity against  
232 SARS-CoV-2 N (Fig. 3C-D) while 8 (17.4%) were negative. Among the 21 antibody  
233 negative controls, 3 (14.3%) demonstrated weak IFN- $\gamma$  cellular reactivity against both  
234 SARS-CoV-2 S and N.

235

#### 236 *Evidence for pre-pandemic SARS-CoV-2 variant*

237

238 In our initial serology, a single sample collected from a FSW in November 2004  
239 demonstrated strong antibody reactivity to both SARS-CoV-2 S and N (Fig. 1A).  
240 Longitudinal antibody analysis of 6 samples collected from this individual between 1997  
241 to 2004 was conducted by SARS-CoV-2 immunoblot as well as the Mikrogen assay that  
242 detected antibodies against the individual antigens of SARS-CoV-2 (S, RBD, and N) and  
243 hCoVs (HKU1, OC43, NL63, and 229E N). Samples collected in 1997 and 2001 showed  
244 antibody reactivity to SARS-CoV-2 N-only by immunoblot with weak antibodies against  
245 hCoVs, particularly in the 1997 sample (Fig. 4A-B). Seroconversion to SARS-CoV-2 S  
246 (2003) and S and RBD (May to November 2004) was observed by both immunoblot and  
247 the Mikrogen assay, accompanied with stronger reactivity to hCoV-HKU1 N and hCoV-  
248 OC43 N. This seroprofile is unique from our other pre-pandemic serology and may

249 indicate exposure to a novel variant – one more closely related to SARS-CoV-2.  
250 Additionally, longitudinal cellular responses were analyzed between 1997 and 2004. In  
251 1997, this individual only had cellular responses against SARS-CoV-2 N. By 2001, this  
252 individual had cellular responses against both SARS-CoV-2 S and N that persisted  
253 throughout 2004 (Fig. 4C). Sequential analysis of SARS-CoV-2 neutralization revealed  
254 no detectable neutralization response against SARS-COV-2 wild-type (Wu-1 614G) in  
255 samples collected in 1997 and 2001 but showed detectable neutralization response in  
256 samples collected in October 2003 (ID<sub>50</sub> titer=281.3) with waning responses observed in  
257 May 2004 (ID<sub>50</sub> titer=195.6); August 2004 (ID<sub>50</sub> titer=121.1) and November 2004 (ID<sub>50</sub>  
258 titer=43.3). The observation of detectable responses coincided with seroconversion of S  
259 and RBD antibodies reflecting exposure to hCoVs with possible cross-reactive potential  
260 due to sequence homogeneity to a SARS-CoV-2 variant. Clinical examination data  
261 collected as part of the prospective HIV clinical protocol did not indicate reporting of  
262 symptoms or signs of respiratory disease, but the patient was noted to have lost  
263 significant (>10%) weight between 2001 to 2003, during which S antibody seroconversion  
264 occurred. The patient was also HIV-positive, 43 years of age in 2003, and had 3 living  
265 children.

266

## 267 **Discussion**

268

269 In early 2021, we studied the immune responses in Nigerian healthcare workers  
270 (HCWs) at Lagos University Teaching Hospital (n=134) and in Oxford/AstraZeneca  
271 COVID-19 vaccine recipients from the general population (n=116) across five local

272 government areas (LGAs) in Lagos state.<sup>5</sup> Antibodies directed to only SARS-CoV-2 N  
273 in the absence of S antibody reactivity were detected in 9.7% (13/134) of HCWs and  
274 15.5% (18/116) of the general population. This antibody profile directed to the SARS-  
275 CoV-2 N alone was suggestive of pre-existing cross-reactive immunity stemming from  
276 prior hCoV infection. To investigate this possibility further, in this study we tested  
277 archived plasma samples collected before the COVID-19 pandemic from our FSW  
278 cohort in Dakar, Senegal (2004-2005), and observed 23.5% (47/200) of individuals with  
279 pre-existing immunity to SARS-CoV-2 N-only (Fig. 1). Further testing demonstrated  
280 prior infections with the seasonal hCoVs, providing evidence that the SARS-CoV-2 N-  
281 only reactivity resulted from cross-reactivity from prior hCoV exposure (Fig. 1-2). The  
282 coronavirus N protein is more conserved than the S protein. As such, previously hCoV  
283 exposed individuals can demonstrate cross-reactive N antibodies without cross-reactive  
284 S antibodies (Figs. 1-2).<sup>5, 26</sup>

285 In one of the few studies conducted on samples from Africa prior to the COVID-  
286 19 pandemic, Tso et al. reported higher reactivity to hCoV N and S antigens with  
287 significantly higher rates of cross-reactivity in Zambia (14.1%) and Tanzania (19%)  
288 compared to the US (2.4%).<sup>27</sup> In a multi-national study, Pedersen et al. reported higher  
289 SARS-CoV-2 N reactivity in Gabon (20/116, 17.2%) compared to reactivity in Canada,  
290 Denmark, and Brazil. In samples from Senegal, largely from subjects under 17 years of  
291 age, high antibody cross-reactivity to both S and N antigens of SARS-CoV-2 was  
292 observed; these samples failed to demonstrate in vitro neutralization.<sup>26</sup> Similar to this  
293 Senegal study, our study also detected pre-pandemic antibody cross-reactivity to

294 SARS-CoV-2, but we concurrently detected cellular cross-reactivity to support the  
295 antibody results.

296 While most investigators study T cell responses to specific antigens using  
297 overlapping peptides, we have used full-length antigens or large peptides fused to a  
298 modified version of the *Bacillus anthracis* lethal factor (LFn). LFn has been shown to act  
299 as a molecular shuttle, transporting antigens of interest into the cytosol for MHC Class I  
300 and Class II processing for CD4+ and CD8+ T cell presentation. In the past, we have  
301 used LFn to study T cell responses against several viruses, including HIV, Ebola, Zika,  
302 dengue, and SARS-CoV-2.<sup>22-24,18</sup> In our SARS-CoV-2 study of Nigerian HCWs and  
303 individuals from the general population, among individuals with SARS-CoV-2 N-only  
304 antibodies prior to vaccination, suggestive of prior exposure to hCoV, 81.8% (9/11) had  
305 T cell responses to SARS-CoV-2 N. These results provided further evidence that  
306 individuals who were previously exposed to hCoVs could have cross-reactive cellular  
307 responses against SARS-CoV-2.

308 Cross-reactive T cell responses play a protective role in protection against  
309 COVID-19. Cellular responses were shown to map to cross-reactive recognition of  
310 SARS-CoV-2 by T cells induced by hCoVs.<sup>28-31</sup> SARS-CoV-2-specific T cells were also  
311 able to cross-react with SARS-CoV-1 and MERS-CoV.<sup>32-35</sup> Recently, Tarke et al.,  
312 demonstrated that pre-pandemic samples collected from healthy adults in the US with  
313 confirmed previous exposure to hCoV-NL63 and -OC43 had significant cross-reactive T  
314 cell responses to SARS-CoV-2, particularly to conserved regions of SARS-CoV-2 S, N,  
315 nsp3, and nsp12.<sup>36</sup> Similarly, Namuniina et al. showed that in pre-pandemic samples  
316 collected in Uganda, a majority of subjects had both CD4+ and/or CD8+ T cell

317 responses against SARS-CoV-2 S and non-S peptide pools.<sup>6</sup> This study however did  
318 not determine whether pre-existing immunity based on previous exposure to hCoV was  
319 responsible for the cross-reactive cellular responses.

320 In the current study using pre-pandemic samples collected from Senegalese  
321 FSWs, we show evidence of cellular cross-reactivity to SARS-CoV-2 with 82.2% (37/45)  
322 and 84.4% (38/45) of PBMC samples matched to SARS-CoV-2 N antibody reactive  
323 plasma samples demonstrating IFN- $\gamma$  responses against S and N, respectively (Fig. 3).  
324 Although these N antibody reactive samples showed no S antibody reactivity, the  
325 majority demonstrated cross-reactive cellular responses to both SARS-CoV-2 S and N,  
326 suggesting that cellular responses against this less conserved region may be more  
327 sustained over time than humoral responses. Among the SARS-CoV-2 negative  
328 controls, a majority (18/21, 85.7%) did not have cellular responses. However, three  
329 control individuals showed weak cellular responses against SARS-CoV-2 S and N. This  
330 again may reflect the more temporal nature of humoral immunity compared with the  
331 longevity of cellular immunity. Additionally, the individual that initially tested antibody  
332 positive for SARS-CoV-2 S-only also had sustained cross-reactive cellular responses to  
333 SARS-CoV-2 S and/or N from 1997 to 2004 (Fig. 4C) with evidence of sustained albeit  
334 waning neutralization responses from 2003 and 2004 (Fig. 4D).

335 It is unknown whether these cross-reactive cellular responses from prior hCoV  
336 infection were sustained at levels that would impact the pathogenesis of SARS-CoV-2  
337 during the 2020 pandemic. Immunologic memory to antigenically related infections can  
338 result in both positive and negative patient outcomes. As described in influenza, the  
339 induction of antibody responses to new virus infection can “backboost” responses to

340 preceding heterologous viruses.<sup>37</sup> In contrast, prior heterologous responses with  
341 reduced functionality may misdirect new responses resulting in negative clinical  
342 outcomes, i.e. “original antigenic sin”<sup>38, 39</sup>, particularly in antigenically shifting viruses  
343 such as SARS COV-2. Our results show significant prior hCoV infection with  
344 demonstrable antibodies to SARS-CoV-2 N and cellular responses to S and N, which  
345 when taken in consideration with low rates of severe COVID-19 disease and mortality in  
346 Africa, suggest through indirect association the possibility that prior hCoV infection  
347 provides cross-reactive protective immunity in SARS-CoV-2 infection.

348         In our risk factor analysis, we saw potential higher risk of SARS-CoV-2 N  
349 reactivity, suggesting previous hCoV infection, in women who were >44 years of age  
350 and who had  $\geq 3$  children. This might be explained by older women having had more  
351 children, and therefore increased exposure to respiratory illnesses from young and  
352 school-aged children amongst whom susceptibility to infection and transmission may be  
353 highest.

354         Our study of pre-pandemic immunologic reactivity to SARS-CoV-2 in Senegal is  
355 unique in its assessment of both antibody and cellular responses. However, our study  
356 has limitations. We were unable to evaluate the cellular immune responses to hCoVs to  
357 verify the proposed source of SARS CoV-2 cross-reactive IFN- $\gamma$  cellular responses. Our  
358 assessment of primary hCoV infection was based on serologic reactivity to hCoV S,  
359 which may not be diagnostic of hCoV infection or correlate with hCoV N reactivity or  
360 cross-reactivity to SARS-CoV-2 N. We were unable to directly test our hypothesis by  
361 demonstrating that a significant fraction of the population possessed antibody and  
362 cellular cross-reactive immune responses to SARS-CoV-2 at the time of the pandemic.



363 Also, our study analyzed samples from only adult females, who may have different  
364 immune responses than males and children.

365 Altogether, our study uniquely analyzed both antibody and cellular responses in  
366 West Africans, demonstrating that pre-existing immunity against hCoVs can induce  
367 cross-reactive T cell responses against SARS-CoV-2. The concurrent measurement of  
368 cross-reactive immune responses from both the antibody and cellular arms of the  
369 adaptive response provides additional support to the hypothesis that pre-existing hCoV  
370 adaptive immunity might impact SARS CoV-2 pathogenesis. These data provide  
371 valuable insights toward a clearer understanding of the dynamics of SARS-CoV-2  
372 disease progression and protection in the West African setting.

373

#### 374 **Role of the funding source**

375 Authors declare that the funder did not have any role in the study design; in the  
376 collection, analysis, and interpretation of data; in the writing of the report; and in the  
377 decision to submit the paper for publication.

378

#### 379 **References**

380 1. Blanton RE, Mock NB, Hiruy HN, Schieffelin JS, Doumbia S, Happi C, Samuels  
381 RJ, Oberhelman RA. African Resources and the Promise of Resilience against COVID-  
382 19. *Am J Trop Med Hyg.* 2020. Epub 2020/06/06. doi: 10.4269/ajtmh.20-0470. PubMed  
383 PMID: 32500851.

384 2. Uyoga S, Adetifa IMO, Karanja HK, Nyagwange J, Tuju J, Wanjiku P, Aman R,  
385 Mwangangi M, Amoth P, Kasera K, Ng'ang'a W, Rombo C, Yegon C, Kithi K, Odhiambo

- 386 E, Rotich T, Orgut I, Kihara S, Otiende M, Bottomley C, Mupe ZN, Kagucia EW,  
387 Gallagher KE, Etyang A, Voller S, Gitonga JN, Mugo D, Agoti CN, Otieno E, Ndwiga L,  
388 Lambe T, Wright D, Barasa E, Tsofa B, Bejon P, Ochola-Oyier LI, Agweyu A, Scott  
389 JAG, Warimwe GM. Seroprevalence of anti-SARS-CoV-2 IgG antibodies in Kenyan  
390 blood donors. *Science*. 2020. Epub 2020/11/13. doi: 10.1126/science.abe1916.  
391 PubMed PMID: 33177105.
- 392 3. Kundu R, Narean JS, Wang L, Fenn J, Pillay T, Fernandez ND, Conibear E,  
393 Koycheva A, Davies M, Tolosa-Wright M, Hakki S, Varro R, McDermott E, Hammett S,  
394 Cutajar J, Thwaites RS, Parker E, Rosadas C, McClure M, Tedder R, Taylor GP,  
395 Dunning J, Lalvani A. Cross-reactive memory T cells associate with protection against  
396 SARS-CoV-2 infection in COVID-19 contacts. *Nat Commun*. 2022;13(1):80. Epub  
397 20220110. doi: 10.1038/s41467-021-27674-x. PubMed PMID: 35013199; PMCID:  
398 PMC8748880.
- 399 4. Swadling L, Diniz MO, Schmidt NM, Amin OE, Chandran A, Shaw E, Pade C,  
400 Gibbons JM, Le Bert N, Tan AT, Jeffery-Smith A, Tan CCS, Tham CYL, Kucykowicz S,  
401 Aidoo-Micah G, Rosenheim J, Davies J, Johnson M, Jensen MP, Joy G, McCoy LE,  
402 Valdes AM, Chain BM, Goldblatt D, Altmann DM, Boyton RJ, Manisty C, Treibel TA,  
403 Moon JC, Investigators CO, van Dorp L, Balloux F, McKnight A, Noursadeghi M,  
404 Bertoletti A, Maini MK. Pre-existing polymerase-specific T cells expand in abortive  
405 seronegative SARS-CoV-2. *Nature*. 2022;601(7891):110-7. Epub 20211110. doi:  
406 10.1038/s41586-021-04186-8. PubMed PMID: 34758478; PMCID: PMC8732273.
- 407 5. Akanmu AS, Herrera BB, Chaplin B, Ogunsola F, Oshibogun A, Onawoga F,  
408 John-Olabode S, Akase IE, Nwosu A, Hamel DJ, Chang CA, Kanki PJ. High SARS-

- 409 CoV-2 seroprevalence in Lagos, Nigeria with robust antibody and cellular responses. *J*  
410 *Clin Viro Plus.* 2023;3(3):100156. doi: <https://doi.org/10.1016/j.jcvp>. 2023.100156.
- 411 6. Namuniina A, Muyanja ES, Biribawa VM, Okech BA, Ssemaganda A, Price MA,  
412 Hills N, Nanteza A, Bagaya BS, Weiskopf D, Riou C, Reynolds SJ, Galiwango RM,  
413 Redd AD. Proportion of Ugandans with pre-pandemic SARS-CoV-2 cross-reactive  
414 CD4+ and CD8+ T-cell responses: A pilot study. *PLOS Glob Public Health.*  
415 2023;3(8):e0001566. Epub 20230816. doi: 10.1371/journal.pgph.0001566. PubMed  
416 PMID: 37585383; PMCID: PMC10431628.
- 417 7. Lipsitch M, Grad YH, Sette A, Crotty S. Cross-reactive memory T cells and herd  
418 immunity to SARS-CoV-2. *Nat Rev Immunol.* 2020;20(11):709-13. Epub 2020/10/08.  
419 doi: 10.1038/s41577-020-00460-4. PubMed PMID: 33024281; PMCID: PMC7537578.
- 420 8. Ng KW, Faulkner N, Cornish GH, Rosa A, Harvey R, Hussain S, Ulferts R, Earl  
421 C, Wrobel AG, Benton DJ, Roustan C, Bolland W, Thompson R, Agua-Doce A, Hobson  
422 P, Heaney J, Rickman H, Paraskevopoulou S, Houlihan CF, Thomson K, Sanchez E,  
423 Shin GY, Spyer MJ, Joshi D, O'Reilly N, Walker PA, Kjaer S, Riddell A, Moore C,  
424 Jebson BR, Wilkinson M, Marshall LR, Rosser EC, Radziszewska A, Peckham H,  
425 Ciurtin C, Wedderburn LR, Beale R, Swanton C, Gandhi S, Stockinger B, McCauley J,  
426 Gamblin SJ, McCoy LE, Cherepanov P, Nastouli E, Kassiotis G. Preexisting and de  
427 novo humoral immunity to SARS-CoV-2 in humans. *Science.* 2020;370(6522):1339-43.  
428 Epub 20201106. doi: 10.1126/science.abe1107. PubMed PMID: 33159009; PMCID:  
429 PMC7857411.
- 430 9. Dugas M, Grote-Westrick T, Merle U, Fontenay M, Kremer AE, Hanses F,  
431 Vollenberg R, Lorentzen E, Tiwari-Heckler S, Duchemin J, Ellouze S, Vetter M, Furst J,

- 432 Schuster P, Brix T, Denkinger CM, Muller-Tidow C, Schmidt H, Tepasse PR, Kuhn J.  
433 Lack of antibodies against seasonal coronavirus OC43 nucleocapsid protein identifies  
434 patients at risk of critical COVID-19. *J Clin Virol.* 2021;139:104847. Epub 20210424.  
435 doi: 10.1016/j.jcv.2021.104847. PubMed PMID: 33965698; PMCID: PMC8065244.
- 436 10. Dugas M, Grote-Westrick T, Vollenberg R, Lorentzen E, Brix T, Schmidt H,  
437 Tepasse PR, Kuhn J. Less severe course of COVID-19 is associated with elevated  
438 levels of antibodies against seasonal human coronaviruses OC43 and HKU1 (HCoV  
439 OC43, HCoV HKU1). *Int J Infect Dis.* 2021;105:304-6. Epub 20210223. doi:  
440 10.1016/j.ijid.2021.02.085. PubMed PMID: 33636357; PMCID: PMC7901274.
- 441 11. Lewis HC, Ware H, Whelan M, Subissi L, Li Z, Ma X, Nardone A, Valenciano M,  
442 Cheng B, Noel K, Cao C, Yanes-Lane M, Herring BL, Talisuna A, Ngoy N, Balde T,  
443 Clifton D, Van Kerkhove MD, Buckeridge D, Bobrovitz N, Okeibunor J, Arora RK,  
444 Bergeri I, Group USC. SARS-CoV-2 infection in Africa: a systematic review and meta-  
445 analysis of standardised seroprevalence studies, from January 2020 to December 2021.  
446 *BMJ Glob Health.* 2022;7(8). doi: 10.1136/bmjgh-2022-008793. PubMed PMID:  
447 35998978; PMCID: PMC9402450.
- 448 12. Tessema SK, Nkengasong JN. Understanding COVID-19 in Africa. *Nat Rev*  
449 *Immunol.* 2021;21(8):469-70. Epub 20210624. doi: 10.1038/s41577-021-00579-y.  
450 PubMed PMID: 34168345; PMCID: PMC8222946.
- 451 13. Kanki PJ, Travers KU, S MB, Hsieh CC, Marlink RG, Gueye NA, Siby T, Thior I,  
452 Hernandez-Avila M, Sankale JL, et al. Slower heterosexual spread of HIV-2 than HIV-1.  
453 *Lancet.* 1994;343(8903):943-6. doi: 10.1016/s0140-6736(94)90065-5. PubMed PMID:  
454 7909009.

- 455 14. Marlink R, Kanki P, Thior I, Travers K, Eisen G, Siby T, Traore I, Hsieh CC, Dia  
456 MC, Gueye EH, et al. Reduced rate of disease development after HIV-2 infection as  
457 compared to HIV-1. *Science*. 1994;265(5178):1587-90. doi: 10.1126/science.7915856.  
458 PubMed PMID: 7915856.
- 459 15. Hamel DJ, Sankale JL, Eisen G, Meloni ST, Mullins C, Gueye-Ndiaye A, Mboup  
460 S, Kanki PJ. Twenty years of prospective molecular epidemiology in Senegal: changes  
461 in HIV diversity. *AIDS Res Hum Retroviruses*. 2007;23(10):1189-96. doi:  
462 10.1089/aid.2007.0037. PubMed PMID: 17961103.
- 463 16. Herrera BB, Tsai WY, Chang CA, Hamel DJ, Wang WK, Lu Y, Mboup S, Kanki  
464 PJ. Sustained Specific and Cross-Reactive T Cell Responses to Zika and Dengue Virus  
465 NS3 in West Africa. *J Virol*. 2018;92(7). Epub 2018/01/13. doi: 10.1128/jvi.01992-17.  
466 PubMed PMID: 29321308; PMCID: PMC5972862.
- 467 17. Sarr AD, Lu Y, Sankale JL, Eisen G, Popper S, Mboup S, Kanki PJ, Cao H.  
468 Robust HIV type 2 cellular immune response measured by a modified anthrax toxin-  
469 based enzyme-linked immunospot assay. *AIDS Res Hum Retroviruses*.  
470 2001;17(13):1257-64. doi: 10.1089/088922201750461311. PubMed PMID: 11559425.
- 471 18. Hanson A, Sarr AD, Shea A, Jones N, Mboup S, Kanki P, Cao H. Distinct profile  
472 of T cell activation in HIV type 2 compared to HIV type 1 infection: differential  
473 mechanism for immunoprotection. *AIDS Res Hum Retroviruses*. 2005;21(9):791-8. doi:  
474 10.1089/aid.2005.21.791. PubMed PMID: 16218803.
- 475 19. Bauer G. The variability of the serological response to SARS-corona virus-2:  
476 Potential resolution of ambiguity through determination of avidity (functional affinity). *J*

477 Med Virol. 2021;93(1):311-22. Epub 20200715. doi: 10.1002/jmv.26262. PubMed PMID:  
478 32633840; PMCID: PMC7361859.

479 20. Struck F, Schreiner P, Staschik E, Wochinz-Richter K, Schulz S, Soutschek E,  
480 Motz M, Bauer G. Incomplete IgG avidity maturation after seasonal coronavirus  
481 infections. J Med Virol. 2022;94(1):186-96. Epub 20210827. doi: 10.1002/jmv.27291.  
482 PubMed PMID: 34427932.

483 21. Herrera BB, Hamel DJ, Oshun P, Akinsola R, Akanmu AS, Chang CA, Eromon  
484 P, Folarin O, Adeyemi KT, Happi CT, Lu Y, Ogunsola F, Kanki PJ. A modified anthrax  
485 toxin-based enzyme-linked immunospot assay reveals robust T cell responses in  
486 symptomatic and asymptomatic Ebola virus exposed individuals. PLoS Negl Trop Dis.  
487 2018;12(5):e0006530. Epub 2018/05/26. doi: 10.1371/journal.pntd.0006530. PubMed  
488 PMID: 29795572; PMCID: PMC5991402.

489 22. Herrera BB, Tsai WY, Brites C, Luz E, Pedroso C, Drexler JF, Wang WK, Kanki  
490 PJ. T Cell Responses to Nonstructural Protein 3 Distinguish Infections by Dengue and  
491 Zika Viruses. MBio. 2018;9(4). doi: 10.1128/mBio.00755-18. PubMed PMID: 30087165;  
492 PMCID: PMC6083909.

493 23. Abdullahi A, Oladele D, Owusu M, Kemp SA, Ayorinde J, Salako A, Fink D, Ige  
494 F, Ferreira I, Meng B, Sylverken AA, Onwuamah C, Boadu KO, Osuolale K, Frimpong  
495 JO, Abubakar R, Okuruawe A, Abdullahi HW, Liboro G, Agyemang LD, Ayisi-Boateng  
496 NK, Odubela O, Ohihoin G, Ezechi O, Kamasah JS, Ameyaw E, Arthur J, Kyei DB,  
497 Owusu DO, Usman O, Mogaji S, Dada A, Agyei G, Ebrahimi S, Gutierrez LC, Aliyu SH,  
498 Doffinger R, Audu R, Adegbola R, Mlcochova P, Phillips RO, Solako BL, Gupta RK.  
499 SARS-COV-2 antibody responses to AZD1222 vaccination in West Africa. Nat

- 500 Commun. 2022;13(1):6131. Epub 20221017. doi: 10.1038/s41467-022-33792-x.
- 501 PubMed PMID: 36253377; PMCID: PMC9574797.
- 502 24. Abdullahi A, Frimpong J, Cheng MTK, Aliyu SH, Smith C, Abimiku A, Phillips RO,  
503 Owusu M, Gupta RK. Performance of SARS COV-2 IgG Anti-N as an Independent  
504 Marker of Exposure to SARS COV-2 in an Unvaccinated West African Population. Am J  
505 Trop Med Hyg. 2023;109(4):890-4. Epub 20230814. doi: 10.4269/ajtmh.23-0179.  
506 PubMed PMID: 37580023; PMCID: PMC10551093.
- 507 25. Wong MP, Meas MA, Adams C, Hernandez S, Green V, Montoya M, Hirsch BM,  
508 Horton M, Quach HL, Quach DL, Shao X, Fedrigo I, Zermeno A, Huffaker J, Montes R,  
509 Madden A, Cyrus S, McDowell D, Williamson P, Contestable P, Stone M, Coloma J,  
510 Busch MP, Barcellos LF, Harris E. Development and Implementation of Dried Blood  
511 Spot-Based COVID-19 Serological Assays for Epidemiologic Studies. Microbiol Spectr.  
512 2022;10(3):e0247121. Epub 20220525. doi: 10.1128/spectrum.02471-21. PubMed  
513 PMID: 35612315; PMCID: PMC9241704.
- 514 26. Pedersen J, Koumakpayi IH, Babuadze G, Baz M, Ndiaye O, Faye O, Diagne  
515 CT, Dia N, Naghibosadat M, McGeer A, Muberaka S, Moukandja IP, Ndidi S, Tauil CB,  
516 Lekana-Douki JB, Loucoubar C, Faye O, Sall A, Magalhaes KG, Weis N, Kozak R,  
517 Kobinger GP, Fausther-Bovendo H. Cross-reactive immunity against SARS-CoV-2 N  
518 protein in Central and West Africa precedes the COVID-19 pandemic. Sci Rep.  
519 2022;12(1):12962. Epub 20220728. doi: 10.1038/s41598-022-17241-9. PubMed PMID:  
520 35902675; PMCID: PMC9333058.
- 521 27. Tso FY, Lidenge SJ, Pena PB, Clegg AA, Ngowi JR, Mwaiselage J, Ngalamika  
522 O, Julius P, West JT, Wood C. High prevalence of pre-existing serological cross-



523 reactivity against severe acute respiratory syndrome coronavirus-2 (SARS-CoV-2) in  
524 sub-Saharan Africa. *Int J Infect Dis.* 2021;102:577-83. Epub 20201108. doi:  
525 10.1016/j.ijid.2020.10.104. PubMed PMID: 33176202; PMCID: PMC7648883.

526 28. Mateus J, Grifoni A, Tarke A, Sidney J, Ramirez SI, Dan JM, Burger ZC,  
527 Rawlings SA, Smith DM, Phillips E, Mallal S, Lammers M, Rubiro P, Quiambao L,  
528 Sutherland A, Yu ED, da Silva Antunes R, Greenbaum J, Frazier A, Markmann AJ,  
529 Premkumar L, de Silva A, Peters B, Crotty S, Sette A, Weiskopf D. Selective and cross-  
530 reactive SARS-CoV-2 T cell epitopes in unexposed humans. *Science.*  
531 2020;370(6512):89-94. Epub 20200804. doi: 10.1126/science.abd3871. PubMed PMID:  
532 32753554; PMCID: PMC7574914.

533 29. Loyal L, Braun J, Henze L, Kruse B, Dingeldey M, Reimer U, Kern F, Schwarz T,  
534 Mangold M, Unger C, Dorfler F, Kadler S, Rosowski J, Gurcan K, Uyar-Aydin Z,  
535 Frentsch M, Kurth F, Schnatbaum K, Eckey M, Hippenstiel S, Hocke A, Muller MA,  
536 Sawitzki B, Miltenyi S, Paul F, Mall MA, Wenschuh H, Voigt S, Drosten C, Lauster R,  
537 Lachman N, Sander LE, Corman VM, Rohmel J, Meyer-Arndt L, Thiel A, Giesecke-Thiel  
538 C. Cross-reactive CD4(+) T cells enhance SARS-CoV-2 immune responses upon  
539 infection and vaccination. *Science.* 2021;374(6564):eabh1823. Epub 20211008. doi:  
540 10.1126/science.abh1823. PubMed PMID: 34465633; PMCID: PMC10026850.

541 30. Nelde A, Bilich T, Heitmann JS, Maringer Y, Salih HR, Roerden M, Lubke M,  
542 Bauer J, Rieth J, Wacker M, Peter A, Horber S, Traenkle B, Kaiser PD, Rothbauer U,  
543 Becker M, Junker D, Krause G, Strengert M, Schneiderhan-Marra N, Templin MF, Joos  
544 TO, Kowalewski DJ, Stos-Zweifel V, Fehr M, Rabsteyn A, Mirakaj V, Karbach J, Jager  
545 E, Graf M, Gruber LC, Rachfalski D, Preuss B, Hagelstein I, Marklin M, Bakchoul T,



- 546 Gouttefangeas C, Kohlbacher O, Klein R, Stevanovic S, Rammensee HG, Walz JS.  
547 SARS-CoV-2-derived peptides define heterologous and COVID-19-induced T cell  
548 recognition. *Nat Immunol.* 2021;22(1):74-85. Epub 20200930. doi: 10.1038/s41590-020-  
549 00808-x. PubMed PMID: 32999467.
- 550 31. Le Bert N, Tan AT, Kunasegaran K, Tham CYL, Hafezi M, Chia A, Chng MHY,  
551 Lin M, Tan N, Linster M, Chia WN, Chen MI, Wang LF, Ooi EE, Kalimuddin S, Tambyah  
552 PA, Low JG, Tan YJ, Bertoletti A. SARS-CoV-2-specific T cell immunity in cases of  
553 COVID-19 and SARS, and uninfected controls. *Nature.* 2020;584(7821):457-62. Epub  
554 2020/07/16. doi: 10.1038/s41586-020-2550-z. PubMed PMID: 32668444.
- 555 32. Grifoni A, Sidney J, Zhang Y, Scheuermann RH, Peters B, Sette A. A Sequence  
556 Homology and Bioinformatic Approach Can Predict Candidate Targets for Immune  
557 Responses to SARS-CoV-2. *Cell Host Microbe.* 2020;27(4):671-80 e2. Epub 20200316.  
558 doi: 10.1016/j.chom.2020.03.002. PubMed PMID: 32183941; PMCID: PMC7142693.
- 559 33. Habel JR, Nguyen THO, van de Sandt CE, Juno JA, Chaurasia P, Wragg K,  
560 Koutsakos M, Hensen L, Jia X, Chua B, Zhang W, Tan HX, Flanagan KL, Doolan DL,  
561 Torresi J, Chen W, Wakim LM, Cheng AC, Doherty PC, Petersen J, Rossjohn J,  
562 Wheatley AK, Kent SJ, Rowntree LC, Kedzierska K. Suboptimal SARS-CoV-2-specific  
563 CD8(+) T cell response associated with the prominent HLA-A\*02:01 phenotype. *Proc*  
564 *Natl Acad Sci U S A.* 2020;117(39):24384-91. Epub 20200910. doi:  
565 10.1073/pnas.2015486117. PubMed PMID: 32913053; PMCID: PMC7533701.
- 566 34. Prakash S, Srivastava R, Coulon PG, Dhanushkodi NR, Chentoufi AA, Tifrea DF,  
567 Edwards RA, Figueroa CJ, Schubl SD, Hsieh L, Buchmeier MJ, Bouziane M, Nesburn  
568 AB, Kuppermann BD, BenMohamed L. Genome-Wide B Cell, CD4(+), and CD8(+) T

569 Cell Epitopes That Are Highly Conserved between Human and Animal Coronaviruses,  
570 Identified from SARS-CoV-2 as Targets for Preemptive Pan-Coronavirus Vaccines. J  
571 Immunol. 2021;206(11):2566-82. Epub 20210428. doi: 10.4049/jimmunol.2001438.  
572 PubMed PMID: 33911008; PMCID: PMC8722450.

573 35. Rha B, Lively JY, Englund JA, Staat MA, Weinberg GA, Selvarangan R, Halasa  
574 NB, Williams JV, Boom JA, Sahni LC, Michaels MG, Stewart LS, Harrison CJ, Szilagyi  
575 PG, McNeal MM, Klein EJ, Strelitz B, Lacombe K, Schlaudecker E, Moffatt ME,  
576 Schuster JE, Pahud BA, Weddle G, Hickey RW, Avadhanula V, Wikswa ME, Hall AJ,  
577 Curns AT, Gerber SI, Langley G. Severe Acute Respiratory Syndrome Coronavirus 2  
578 Infections in Children: Multicenter Surveillance, United States, January-March 2020. J  
579 Pediatric Infect Dis Soc. 2020;9(5):609-12. doi: 10.1093/jpids/piaa075. PubMed PMID:  
580 32556327; PMCID: PMC7337823.

581 36. Tarke A, Zhang Y, Methot N, Narowski TM, Phillips E, Mallal S, Frazier A, Filaci  
582 G, Weiskopf D, Dan JM, Premkumar L, Scheuermann RH, Sette A, Grifoni A. Targets  
583 and cross-reactivity of human T cell recognition of Common Cold Coronaviruses.  
584 bioRxiv. 2023. Epub 20230105. doi: 10.1101/2023.01.04.522794. PubMed PMID:  
585 36656777; PMCID: PMC9844015.

586 37. Fonville JM, Wilks SH, James SL, Fox A, Ventresca M, Aban M, Xue L, Jones  
587 TC, Le NMH, Pham QT, Tran ND, Wong Y, Mosterin A, Katzelnick LC, Labonte D, Le  
588 TT, van der Net G, Skepner E, Russell CA, Kaplan TD, Rimmelzwaan GF, Masurel N,  
589 de Jong JC, Palache A, Beyer WEP, Le QM, Nguyen TH, Wertheim HFL, Hurt AC,  
590 Osterhaus A, Barr IG, Fouchier RAM, Horby PW, Smith DJ. Antibody landscapes after

591 influenza virus infection or vaccination. *Science*. 2014;346(6212):996-1000. doi:  
592 10.1126/science.1256427. PubMed PMID: 25414313; PMCID: PMC4246172.

593 38. Halstead SB, O'Rourke EJ. Antibody-enhanced dengue virus infection in primate  
594 leukocytes. *Nature*. 1977;265(5596):739-41. PubMed PMID: 404559.

595 39. Aguilar-Bretones M, Westerhuis BM, Raadsen MP, de Bruin E, Chandler FD,  
596 Okba NM, Haagmans BL, Langerak T, Endeman H, van den Akker JP, Gommers DA,  
597 van Gorp EC, GeurtsvanKessel CH, de Vries RD, Fouchier RA, Rockx BH, Koopmans  
598 MP, van Nierop GP. Seasonal coronavirus-specific B cells with limited SARS-CoV-2  
599 cross-reactivity dominate the IgG response in severe COVID-19. *The Journal of clinical*  
600 *investigation*. 2021;131(21). doi: 10.1172/JCI150613. PubMed PMID: 34499051;  
601 PMCID: PMC8553556.

602

**A**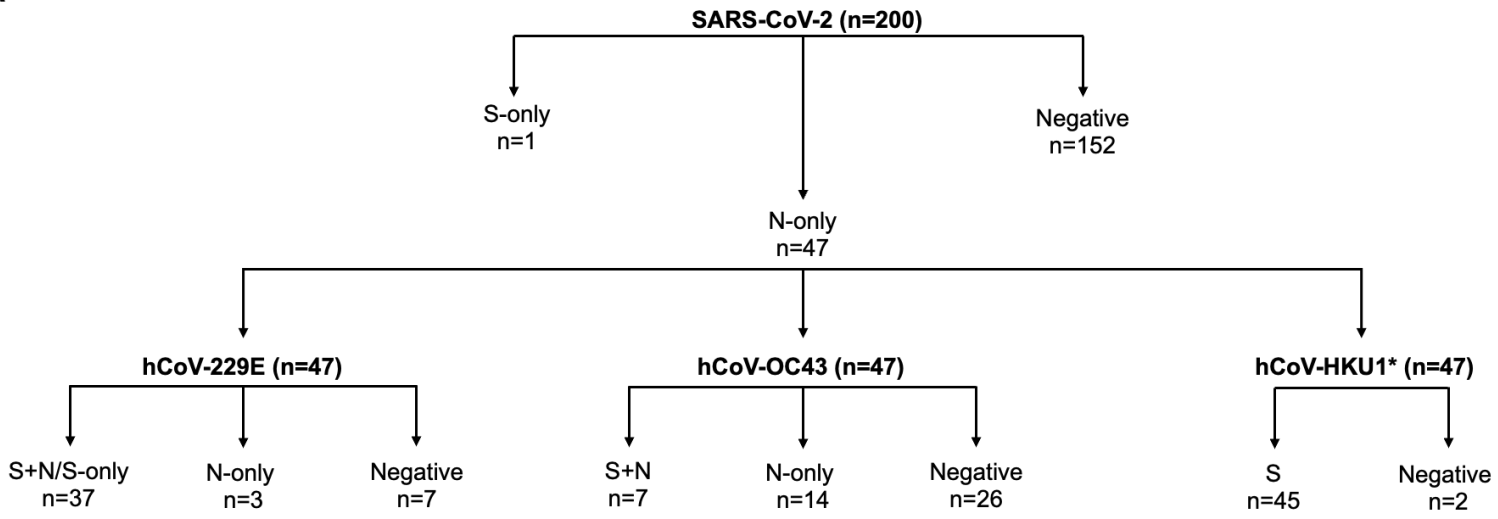**B**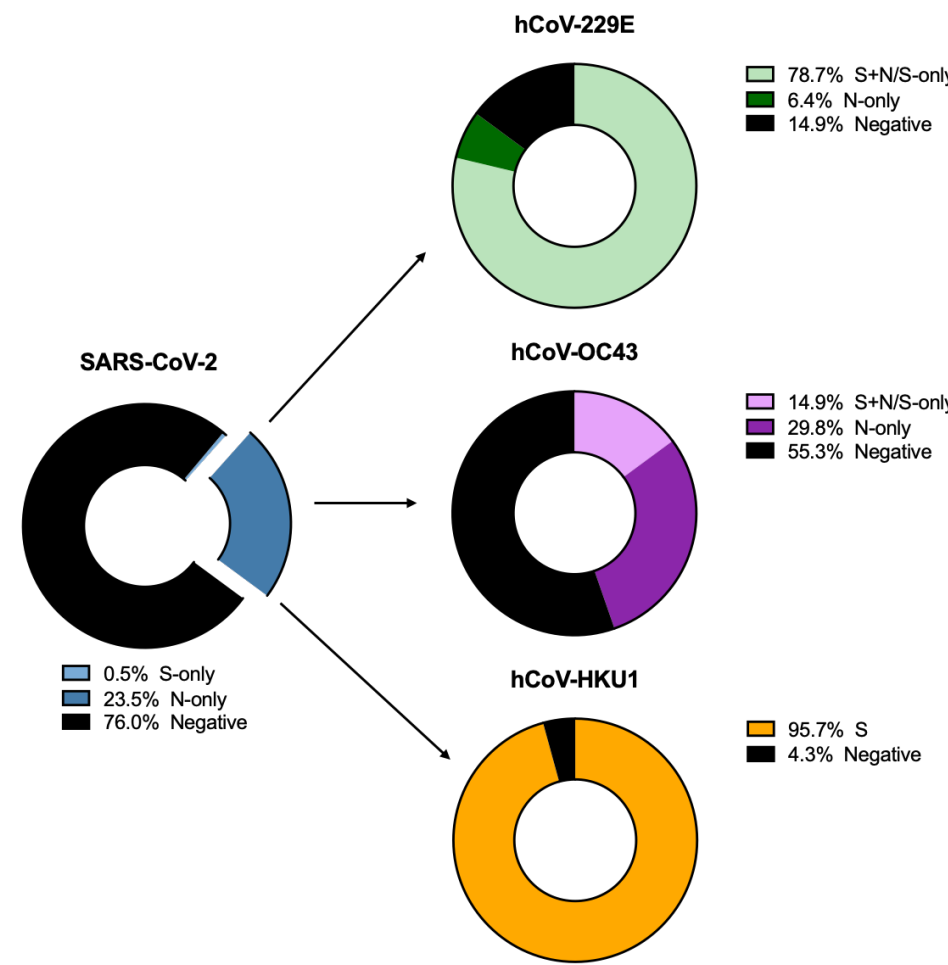

**Fig. 1. SARS-CoV-2 and hCoVs seroprevalence rates. A) Schematic representation of serology workflow.** \*, Samples were analyzed against hCoV-HKU1 S only. B) 200 samples were initially tested against SARS-CoV-2 S and N; 47 samples had antibodies against SARS-CoV-2 N-only (blue donut chart). These 47 samples were then tested against hCoV-229E S and N (green donut chart), hCoV-OC43 S and N (purple donut chart), and hCoV-HKU1 S (yellow donut chart).

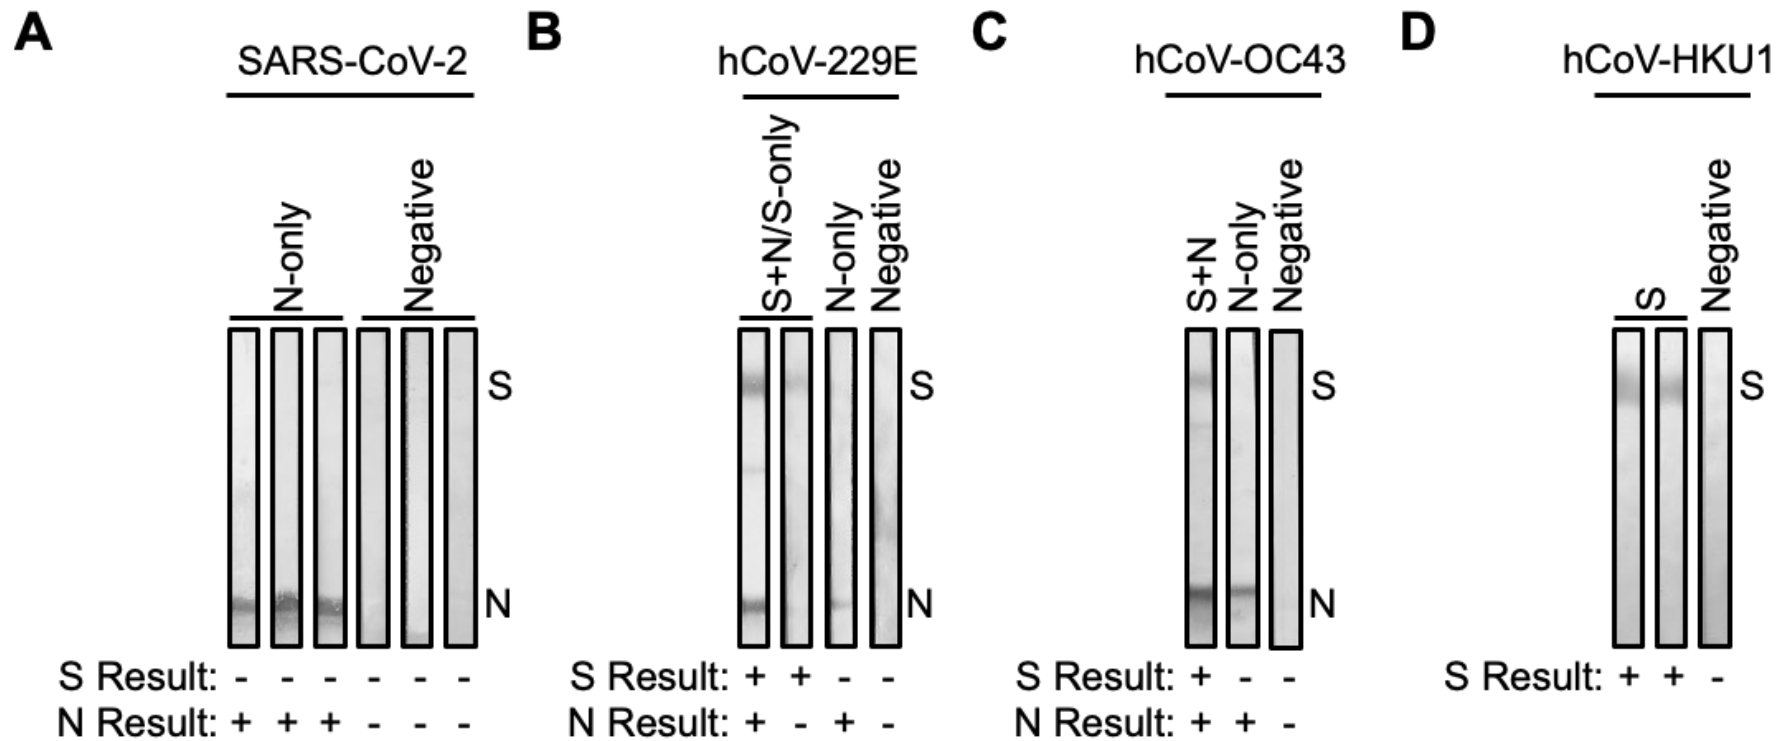

**Fig. 2. SARS-CoV-2 and hCoV antibody cross-reactive in samples collected pre-pandemic.** Plasma collected from FSWs prior to the COVID-19 pandemic were subjected to immunoblot analysis. Representative images of immunoblots for samples that had antibodies for A) SARS-CoV-2 N-only or were negative, B) hCoV-229E S+N/S-only, N-only, or were negative, C) hCoV-OC43 S+N, N-only, or were negative, and D) hCoV-HKU1 S or were negative.

Table 1. Associations between baseline characteristics and SARS-CoV-2 nucleocapsid (N) antibody reactivity (N=200<sup>1</sup>)

|                   | N reactive |       | N non-reactive |       | Chi-square* p-value |
|-------------------|------------|-------|----------------|-------|---------------------|
|                   | No.        | %     | No.            | %     |                     |
| Year of sampling  |            |       |                |       |                     |
| 2004              | 74         | 81.3% | 17             | 18.7% | 0.142               |
| 2005              | 79         | 72.5% | 30             | 27.5% |                     |
| Age at sampling   |            |       |                |       |                     |
| ≤44 years         | 92         | 76.0% | 29             | 24.0% | 0.078               |
| >44 years         | 22         | 61.1% | 14             | 38.9% |                     |
| Neighborhood      |            |       |                |       |                     |
| Dakar             | 82         | 75.2% | 27             | 24.8% | 0.582               |
| Outside Dakar     | 37         | 71.2% | 15             | 28.8% |                     |
| Ethnicity         |            |       |                |       |                     |
| Wolof             | 47         | 78.3% | 13             | 21.7% | 0.188               |
| Other             | 68         | 68.7% | 31             | 31.3% |                     |
| Country of origin |            |       |                |       |                     |
| Senegal           | 106        | 73.1% | 39             | 26.9% | 0.535*              |
| Other             | 9          | 64.3% | 5              | 35.7% |                     |
| Marital status    |            |       |                |       |                     |
| Single            | 34         | 77.3% | 10             | 22.7% | 0.578*              |
| Divorced          | 64         | 71.9% | 25             | 28.1% |                     |
| Widowed           | 7          | 63.6% | 4              | 36.4% |                     |
| Religion          |            |       |                |       |                     |
| Muslim            | 94         | 73.4% | 34             | 26.6% | 0.767*              |
| Christian         | 11         | 68.8% | 5              | 31.3% |                     |
| Education         |            |       |                |       |                     |
| None              | 43         | 69.4% | 19             | 30.6% | 0.428               |
| 1-6 years         | 30         | 81.1% | 7              | 18.9% |                     |
| 7-14 years        | 30         | 71.4% | 12             | 28.6% |                     |
| Total children    |            |       |                |       |                     |
| 0-2               | 70         | 78.7% | 19             | 21.3% | 0.044               |
| ≥3                | 45         | 64.3% | 25             | 35.7% |                     |

<sup>1</sup> 200 samples tested: 47 SARS-CoV-2 N positive, 153 SARS-CoV-2 N negative. 159 had baseline record.

\*Fisher's exact test was used for variables with cells with observed frequencies ≤5.

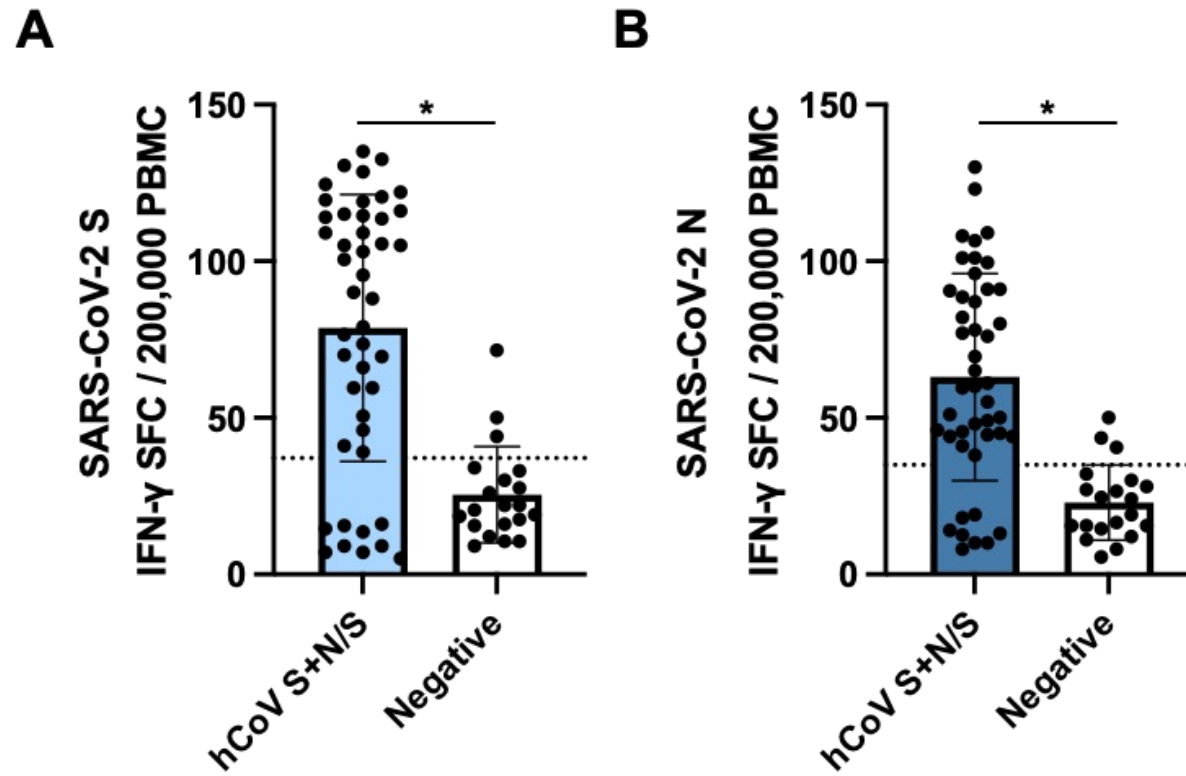

**Fig. 3. Cross-reactive SARS-CoV-2 cellular responses in samples collected pre-pandemic.** PBMCs collected from FSWs prior to the COVID-19 pandemic were stimulated with A) LFn-SARS-CoV-2 S or B) LFn-SARS-CoV-2 N and IFN- $\gamma$  responses were detected by ELISPOT. SFC, spot forming cells. Black dotted lines, LFn-SARS-CoV-2 S and N cutoffs.

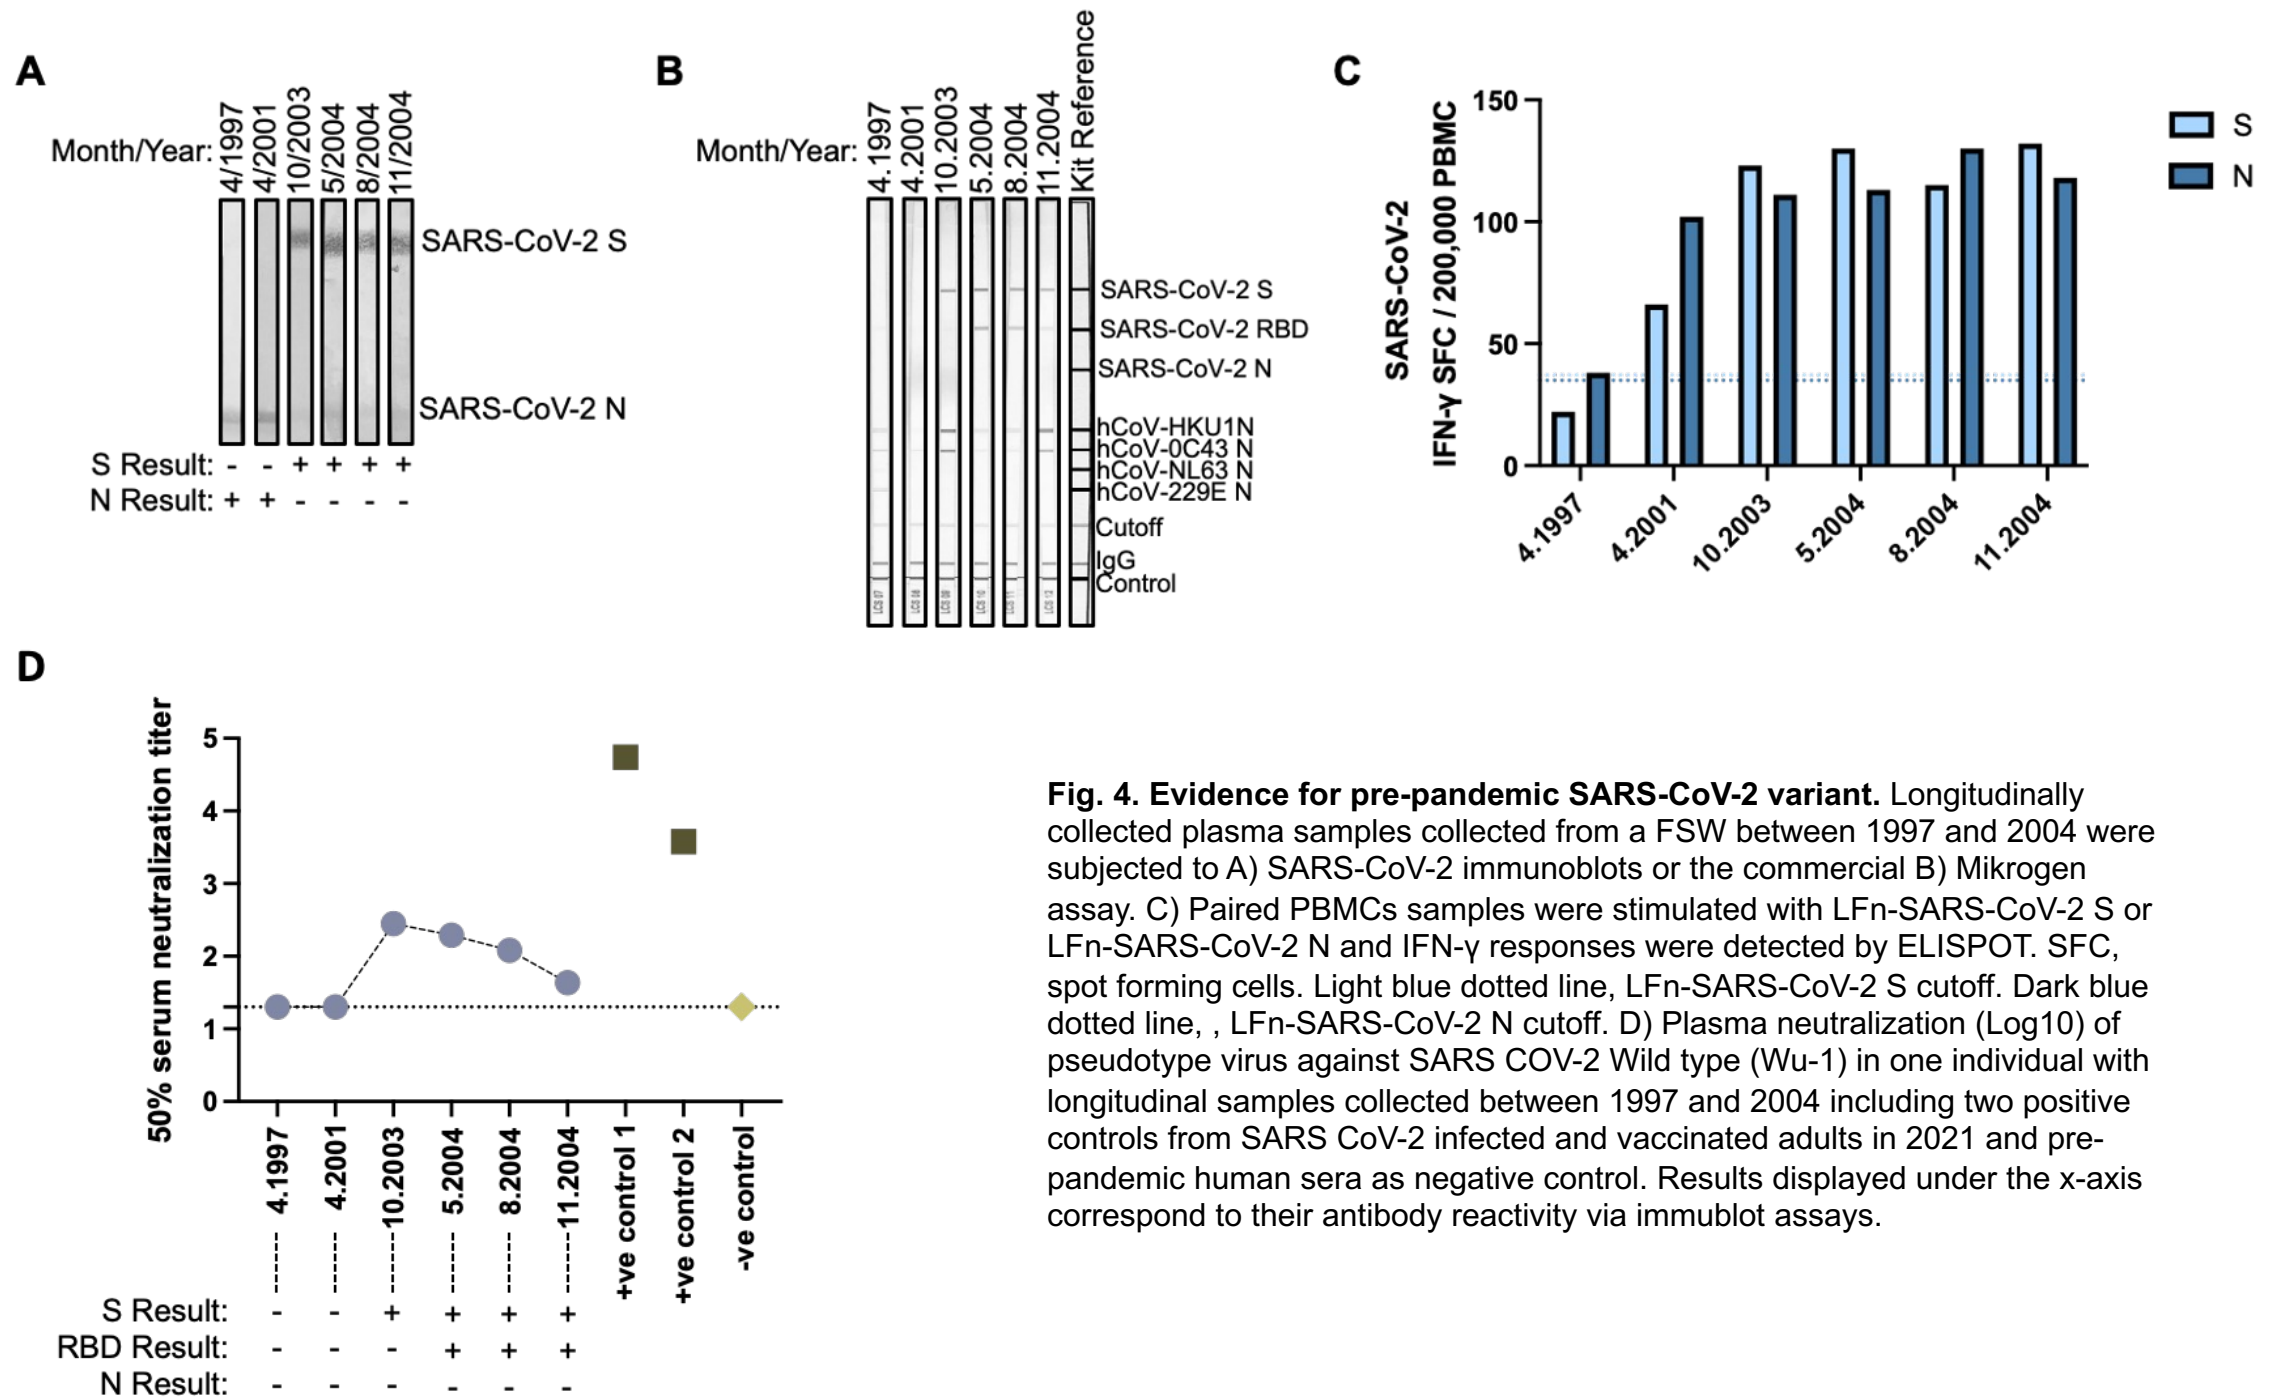

**Fig. 4. Evidence for pre-pandemic SARS-CoV-2 variant.** Longitudinally collected plasma samples collected from a FSW between 1997 and 2004 were subjected to A) SARS-CoV-2 immunoblots or the commercial B) Mikrogen assay. C) Paired PBMCs samples were stimulated with LFn-SARS-CoV-2 S or LFn-SARS-CoV-2 N and IFN- $\gamma$  responses were detected by ELISPOT. SFC, spot forming cells. Light blue dotted line, LFn-SARS-CoV-2 S cutoff. Dark blue dotted line, LFn-SARS-CoV-2 N cutoff. D) Plasma neutralization (Log10) of pseudotype virus against SARS CoV-2 Wild type (Wu-1) in one individual with longitudinal samples collected between 1997 and 2004 including two positive controls from SARS CoV-2 infected and vaccinated adults in 2021 and pre-pandemic human sera as negative control. Results displayed under the x-axis correspond to their antibody reactivity via immublot assays.



**Supplementary Fig. 1. Overlap in reactivity between hCoV-229E and hCoV-OC43.**

|      |          | 229E   |          |        |          |       |
|------|----------|--------|----------|--------|----------|-------|
|      |          | S-only | S+N      | N-only | Negative | TOTAL |
| OC43 | S-only   |        | <b>1</b> |        |          | 1     |
|      | S+N*     |        | <b>5</b> | 1      |          | 6     |
|      | N-only   | 2      | 18       | 2      | 3        | 25    |
|      | Negative | 5      | 5        |        | 3        | 13    |
|      | TOTAL    | 7      | 29       | 3      | 6        | 45    |

**Supplementary Fig. 2. Overlap in reactivity between hCoV-229E S and hCoV-HKU1 S.**

|         |                | 229E     |           |        |          |       |
|---------|----------------|----------|-----------|--------|----------|-------|
|         |                | S-only   | S+N       | N-only | Negative | TOTAL |
| HKU-1 S | Spike-reactive | <b>7</b> | <b>29</b> | 3      | 6        | 45    |
|         | Negative       |          | 1         |        | 1        | 2     |
|         | TOTAL          | 7        | 30        | 3      | 7        | 47    |

**Supplementary Fig. 3. Overlap in reactivity between hCoV-OC43 S and hCoV-HKU1 S.**

|         |                | OC43     |          |        |          |       |
|---------|----------------|----------|----------|--------|----------|-------|
|         |                | S-only   | S+N      | N-only | Negative | TOTAL |
| HKU-1 S | Spike-reactive | <b>1</b> | <b>6</b> | 25     | 13       | 45    |
|         | Negative       |          |          | 1      | 1        | 2     |
|         | TOTAL          | 1        | 6        | 26     | 14       | 47    |
